# Supplementary material for: TGF-β drives the conversion of conventional NK cells into uterine tissue-resident NK cells to support murine pregnancy
Source: eLife. 2026 Jul 8;15:RP109878. doi: 10.7554/eLife.109878 (PMC13345626; doi:10.7554/eLife.109878)
Supplement: Figure 1—source data 1. [file elife-109878-fig1-data1.xlsx]

## Sheet: Figure 1B
		Number of Cells	Number of Beads	Absolute Number	Aliquots	Total Number				Column B	gd 14.5
GD 6.5 cNKs	M11	51	138	1847.83	1	1847.83				vs.	vs.
	M12	54	155	1741.94	1	1741.94				Column A	gd 6.5
	M13	71	180	1972.22	1	1972.22
	M21	43	176	1221.59	1	1221.59				Mann Whitney test
	M22	47	154	1525.97	1	1525.97				P value	0.0005
	M23	23	133	864.662	1	864.662				Exact or approximate P value?	Exact
	M31	52	143	1818.18	1	1818.18				P value summary	***
	M32	34	165	1030.3	1	1030.3				Significantly different (P < 0.05)?	Yes
	M33	35	124	1411.29	1	1411.29				One- or two-tailed P value?	Two-tailed
										Sum of ranks in column A,B	49 , 122
										Mann-Whitney U	4
		Number of Cells	Number of Beads	Absolute Number	Aliquots	Total Number
GD 14.5 cNKs	M11	805	2426	1659.11	1	1659.11
	M12	1427	3048	2340.88	1	2340.88
	M13	1921	2863	3354.87	1	3354.87
	M21	1775	3610	2458.45	1	2458.45
	M22	1485	3728	1991.68	1	1991.68
	M23	2015	3400	2963.24	1	2963.24
	M31	1245	2587	2406.26	1	2406.26
	M32	1302	2334	2789.2	1	2789.2
	M33	1440	2951	2439.85	1	2439.85
