# Supplementary material for: TGF-β drives the conversion of conventional NK cells into uterine tissue-resident NK cells to support murine pregnancy
Source: eLife. 2026 Jul 8;15:RP109878. doi: 10.7554/eLife.109878 (PMC13345626; doi:10.7554/eLife.109878)
Supplement: Figure 1—source data 2. [file elife-109878-fig1-data2.xlsx]

## Sheet: Figure 1D
Number of cNK cells Transferred Per Mouse		cNK Cells	Number of Cells	Number of Beads	Absolute Number	Total Number		Percent Derivided from Transferred cNK cells
2500000		M11	33	480	343.75	1298.07		0.0519229
		M12	48	800	300
		M13	38	995	190.955
		M14	17	458	185.59
		M15	1	18	277.778
		M16	0	137	0
		M21	4	159	125.786	1040.16		0.0416063
		M22	2	132	75.7576
		M23	3	90	166.667
		M24	22	468	235.043
		M25	15	422	177.725
		M26	24	463	259.179
		M31	46	3174	144.928	1597.19		0.0638875
		M32	48	1761	272.572
		M33	67	1431	468.204
		M34	63	1603	393.013
		M35	50	1570	318.471
		M41	7	198	176.768	1164.35		0.0465741
		M42	5	147	170.068
		M43	6	80	375
		M44	19	763	124.509
		M45	8	532	75.188
		M46	10	456	109.649
		M47	22	826	133.172
		trNK Cells	Number of Cells	Number of Beads	Absolute Number	Total Number		Percent Derivided from Transferred cNK cells
		M11	50	480	520.833	7421.66		0.296866
		M12	29	800	181.25
		M13	56	995	281.407
		M14	6	458	65.5022
		M15	19	18	5277.78
		M16	30	137	1094.89
		M21	24	159	754.717	8634.95		0.345398
		M22	62	132	2348.48
		M23	26	90	1444.44
		M24	196	468	2094.02
		M25	78	422	924.171
		M26	99	463	1069.11
		M31	212	3174	333.963	3724.66		0.148987
		M32	275	1761	780.806
		M33	352	1431	1229.91
		M34	179	1603	558.328
		M35	258	1570	821.656
		M41	27	198	681.818	4754.88		0.190195
		M42	32	147	1088.44
		M43	23	80	1437.5
		M44	26	763	170.38
		M45	59	532	554.511
		M46	38	456	416.667
		M47	67	826	405.569
		ILC1s	Number of Cells	Number of Beads	Absolute Number	Total Number		Percent Derivided from Transferred cNK cells
			2	480	20.8333	169.49		0.00677962
			4	800	25
			13	995	65.3266
			2	458	21.8341
			0	18	0
			1	137	36.4964
			1	159	31.4465	102.537		0.00410146
			0	132	0
			0	90	0
			0	468	0
			6	422	71.09
			0	463	0
			7	3174	11.0271	250.059		0.0100024
			14	1761	39.7501
			11	1431	38.4347
			24	1603	74.8596
			27	1570	85.9873
			20	198	505.051	2070.86		0.0828343
			13	147	442.177
			0	80	0
			39	763	255.57
			32	532	300.752
			28	456	307.018
			43	826	260.291
