# Supplementary material for: TGF-β drives the conversion of conventional NK cells into uterine tissue-resident NK cells to support murine pregnancy
Source: eLife. 2026 Jul 8;15:RP109878. doi: 10.7554/eLife.109878 (PMC13345626; doi:10.7554/eLife.109878)
Supplement: Figure 2—figure supplement 1—source data 1. [file elife-109878-fig2-figsupp1-data1.xlsx]

## Sheet: Figure 2-Fig. Sup. 1 B, D
ABSOLUTE NUMBER OF CELLS PREGNANT UTERUS GD 6.5														ABSOLUTE NUMBER OF CELLS SPLEEN
C57BL/6 CD45.1		Number of Cells	Number of Beads	Absolute Number		Ncr1icre		Number of Cells	Number of Beads	Absolute Number				C57BL/6 CD45.1		Number of Cells	Number of Beads	Absolute Number		Ncr1icre		Number of Cells	Number of Beads	Absolute Number
cNKs	M11	402	471	4267.52		cNKs	M11	975	329	14817.6				cNKs	M11	8996	259	173668		cNKs	M11	8743	188	232527
	M12	415	419	4952.27			M12	800	648	6172.84					M21	11455	262	218607			M21	6463	145	222862
	M13	313	300	5216.67			M13	463	354	6539.55					M31	8900	246	180894			M31	7528	198	190101
	M14	397	296	6706.08			M14	992	419	11837.7
	M15	326	258	6317.83			M15	510	293	8703.07
	M16	206	237	4345.99			M16	710	287	12369.3
	M17	202	158	6392.41			M17	768	404	9504.95
	M21	408	261	7816.09			M21	650	313	10383.4
	M22	360	215	8372.09			M22	630	450	7000
	M23	553	289	9567.47			M23	362	314	5764.33
	M24	378	159	11886.8			M24	423	447	4731.54
	M25	329	290	5672.41			M25	698	390	8948.72
	M26	368	260	7076.92			M26	650	479	6784.97
	M27	364	159	11446.5			M27	487	545	4467.89
	M31	254	202	6287.13			M31	553	779	3549.42
	M32	177	247	3583			M32	542	468	5790.6
	M33	151	151	5000			M33	335	286	5856.64
	M34	239	320	3734.38			M34	435	337	6454.01
	M35	253	215	5883.72			M35	710	410	8658.54
	M36	309	425	3635.29			M36	325	302	5380.79
	M37	272	231	5887.45			M37	402	259	7760.62
C57BL/6 CD45.1		Number of Cells	Number of Beads	Absolute Number		Ncr1icre		Number of Cells	Number of Beads	Absolute Number				C57BL/6 CD45.1		Number of Cells	Number of Beads	Absolute Number		Ncr1icre		Number of Cells	Number of Beads	Absolute Number
trNKs	M11	7888	471	83736.7		trNKs	M11	6517	329	99042.6				trNKs	M11	116	259	2239.38		trNKs	M11	131	188	3484.04
	M12	5202	419	62076.4			M12	7135	648	55054					M21	155	262	2958.02			M21	224	145	7724.14
	M13	5440	300	90666.7			M13	7520	354	106215					M31	40	246	813.008			M31	155	198	3914.14
	M14	4794	296	80979.7			M14	6465	419	77148
	M15	3450	258	66860.5			M15	4998	293	85290.1
	M16	4531	237	95590.7			M16	2480	287	43205.6
	M17	3083	158	97563.3			M17	7620	404	94306.9
	M21	5196	261	99540.2			M21	8395	313	134105
	M22	3122	215	72604.7			M22	7370	450	81888.9
	M23	5639	289	97560.6			M23	6420	314	102229
	M24	3321	159	104434			M24	8880	447	99328.9
	M25	3765	290	64913.8			M25	4995	390	64038.5
	M26	4539	260	87288.5			M26	5240	479	54697.3
	M27	1972	159	62012.6			M27	7410	545	67981.7
	M31	2849	202	70519.8			M31	9688	779	62182.3
	M32	3228	247	65344.1			M32	4642	468	49594
	M33	2202	151	72913.9			M33	3225	286	56381.1
	M34	4380	320	68437.5			M34	3925	337	58234.4
	M35	4290	215	99767.4			M35	4163	410	50768.3
	M36	5100	425	60000			M36	4660	302	77152.3
	M37	4599	231	99545.5			M37	4510	259	87065.6
C57BL/6 CD45.1		Number of Cells	Number of Beads	Absolute Number		Ncr1icre		Number of Cells	Number of Beads	Absolute Number				C57BL/6 CD45.1		Number of Cells	Number of Beads	Absolute Number		Ncr1icre		Number of Cells	Number of Beads	Absolute Number
ILC1s	M11	1152	471	12229.3		ILC1s	M11	495	329	7522.8				ILC1s	M11	289	259	5579.15		ILC1s	M11	121	188	3218.09
	M12	198	419	2362.77			M12	733	648	5655.86					M21	183	262	3492.37			M21	132	145	4551.72
	M13	537	300	8950			M13	197	354	2782.49					M31	117	246	2378.05			M31	154	198	3888.89
	M14	397	296	6706.08			M14	585	419	6980.91
	M15	469	258	9089.15			M15	137	293	2337.88
	M16	572	237	12067.5			M16	170	287	2961.67
	M17	34	158	1075.95			M17	442	404	5470.3
	M21	43	261	823.755			M21	545	313	8706.07
	M22	138	215	3209.3			M22	865	450	9611.11
	M23	285	289	4930.8			M23	215	314	3423.57
	M24	62	159	1949.69			M24	330	447	3691.28
	M25	114	290	1965.52			M25	365	390	4679.49
	M26	111	260	2134.62			M26	530	479	5532.36
	M27	93	159	2924.53			M27	645	545	5917.43
	M31	137	202	3391.09			M31	278	779	1784.34
	M32	153	247	3097.17			M32	305	468	3258.55
	M33	71	151	2350.99			M33	270	286	4720.28
	M34	98	320	1531.25			M34	225	337	3338.28
	M35	415	215	9651.16			M35	338	410	4121.95
	M36	629	425	7400			M36	526	302	8708.61
	M37	368	231	7965.37			M37	167	259	3223.94
cNK cells			trNK cells				ILCs
Group B	Ncr1icre		Group B	Ncr1icre			Group B	Ncr1icre
vs.	vs.		vs.	vs.			vs.	vs.
Group A	Wildtype		Group A	Wildtype			Group A	Wildtype
Mann Whitney test			Mann Whitney test				Mann Whitney test
P value	0.1196		P value	0.1844			P value	0.4697
Exact or approximate P value?	Exact		Exact or approximate P value?	Exact			Exact or approximate P value?	Exact
P value summary	ns		P value summary	ns			P value summary	ns
Significantly different (P < 0.05)?	No		Significantly different (P < 0.05)?	No			Significantly different (P < 0.05)?	No
One- or two-tailed P value?	Two-tailed		One- or two-tailed P value?	Two-tailed			One- or two-tailed P value?	Two-tailed
Sum of ranks in group A,B	389 , 514		Sum of ranks in group A,B	505 , 398			Sum of ranks in group A,B	422 , 481
Mann-Whitney U	158		Mann-Whitney U	167			Mann-Whitney U	191
