# Supplementary material for: TGF-β drives the conversion of conventional NK cells into uterine tissue-resident NK cells to support murine pregnancy
Source: eLife. 2026 Jul 8;15:RP109878. doi: 10.7554/eLife.109878 (PMC13345626; doi:10.7554/eLife.109878)
Supplement: Figure 2—figure supplement 1—source data 2. [file elife-109878-fig2-figsupp1-data2.xlsx]

## Sheet: Figure 2-Fig. Sup. 1 E,F
Implantaion Site Number gd 6.5			Resorption Rates gd 16.5
C57BL/6 CD45.1	Ncr1icre		C57BL/6 CD45.1	Ncr1icre
8	9		0	0
9	12		0	0
11	11		0	0
Group B	Ncr1iCre		Group B	Ncr1iCre
vs.	vs.		vs.	vs.
Group A	C57BL/6 CD45.1		Group A	C57BL/6 CD45.1
Mann Whitney test			Mann Whitney test
P value	0.5		P value	>0.9999
Exact or approximate P value?	Exact		Exact or approximate P value?	Exact
P value summary	ns		P value summary	ns
Significantly different (P < 0.05)?	No		Significantly different (P < 0.05)?	No
One- or two-tailed P value?	Two-tailed		One- or two-tailed P value?	Two-tailed
Sum of ranks in group A,B	8 , 13		Sum of ranks in group A,B	10.50 , 10.50
Mann-Whitney U	2		Mann-Whitney U	4.5
