# Supplementary material for: TGF-β drives the conversion of conventional NK cells into uterine tissue-resident NK cells to support murine pregnancy
Source: eLife. 2026 Jul 8;15:RP109878. doi: 10.7554/eLife.109878 (PMC13345626; doi:10.7554/eLife.109878)
Supplement: Figure 2—source data 1. [file elife-109878-fig2-data1.xlsx]

## Sheet: Figure 2A
TGFβRII Expression (MFI) on NK Cell Subsets
TGF-βRIINcr1Δ	Virgin Mouse	Pregnant Mouse
Splenic cNK Cells	Splenic cNK Cells	Splenic cNK Cells	Uterine trNK Cells	Uterine cNK Cells		Table Analyzed	Data 1
220	340	384	718	584
228	358	317	717	587		Column E	Uterine cNK Cells
	313	446	1067	910		vs.	vs.
	376	491	1081	950		Column C	Splenic cNK Cells
	382	448	759	582
		430	754	591		Mann Whitney test
		415	847	738		P value	0.0002
		399	869	748		Exact or approximate P value?	Exact
						P value summary	***
						Significantly different (P < 0.05)?	Yes
						One- or two-tailed P value?	Two-tailed
						Sum of ranks in column C,E	36 , 100
						Mann-Whitney U	0
