# Supplementary material for: TGF-β drives the conversion of conventional NK cells into uterine tissue-resident NK cells to support murine pregnancy
Source: eLife. 2026 Jul 8;15:RP109878. doi: 10.7554/eLife.109878 (PMC13345626; doi:10.7554/eLife.109878)
Supplement: Figure 2—source data 2. [file elife-109878-fig2-data2.xlsx]

## Sheet: Figure 2 C, E
ABSOLUTE NUMBER OF CELLS PREGNANT UTERUS GD 6.5														ABSOLUTE NUMBER OF CELLS SPLEEN
Littermates		Number of Cells	Number of Beads	Absolute Number		TGF-βRIINcr1Δ		Number of Cells	Number of Beads	Absolute Number				Littermates		Number of Cells	Number of Beads	Absolute Number		TGF-βRIINcr1Δ		Number of Cells	Number of Beads	Absolute Number
cNKs	1	271	170	7970.59		cNKs	1	550	233	11802.6				cNKs	M11	21312	58	1.83724e+06		cNKs	M11	63484	123	2.58065e+06
	2	512	197	12994.9			2	848	382	11099.5					M21	20304	47	2160000			M21	15724	43	1.82837e+06
	3	199	132	7537.88			3	708	866	4087.76					M31	16872	34	2.48118e+06			M31	8352	23	1.81565e+06
	4	163	103	7912.62			4	481	145	16586.2					M41	14300	48	1.48958e+06			M42	47136	99	2.38061e+06
	5	298	155	9612.9			5	460	849	2709.07					M51	17352	44	1.97182e+06			M51	23120	57	2.02807e+06
	6	263	134	9813.43			6	885	292	15154.1					M61	15636	32	2443125
	7	395	189	10449.7			7	757	184	20570.7
	8	165	144	5729.17			8	681	271	12564.6
	9	249	166	7500			9	514	113	22743.4
	10	188	203	4630.54			10	412	112	18392.9
	11	427	199	10728.6			11	1301	350	18585.7
	12	322	191	8429.32			12	391	139	14064.7
	13	303	135	11222.2			13	491	195	12589.7
	14	302	164	9207.32			14	309	102	15147.1
	15	280	132	10606.1			15	300	126	11904.8
	16	296	174	8505.75
	17	296	112	13214.3
	18	226	124	9112.9
	19	167	173	4826.59
	20	166	167	4970.06
	21	148	152	4868.42
	22	129	129	5000
	23	225	135	8333.33		TGF-βRIINcr1Δ		Number of Cells	Number of Beads	Absolute Number				Littermates		Number of Cells	Number of Beads	Absolute Number		TGF-βRIINcr1Δ		Number of Cells	Number of Beads	Absolute Number
	24	265	165	8030.3		trNKs	1	0	233	0				trNKs	M11	20	58	1724.14		trNKs	M11	32	123	1300.81
	25	276	190	7263.16			2	0	382	0					M21	4	47	425.532			M21	63	43	7325.58
	26	177	126	7023.81			3	5	866	28.8684					M31	20	34	2941.18			M31	20	23	4347.83
	27	149	101	7376.24			4	3	145	103.448					M41	20	48	2083.33			M41	96	99	4848.48
	28	936	526	8897.34			5	6	849	35.3357					M51	12	44	1363.64			M51	44	57	3859.65
	29	444	271	8191.88			6	194	292	3321.92					M61	12	32	1875
	30	604	462	6536.8			7	205	184	5570.65
	31	419	204	10269.6			8	157	271	2896.68
	32	425	310	6854.84			9	117	113	5176.99
	33	482	538	4479.55			10	103	112	4598.21
	34	425	439	4840.55			11	350	350	5000
	35	402	361	5567.87			12	128	139	4604.32
	36	506	403	6277.92			13	59	195	1512.82
	37	257	172	7470.93			14	46	102	2254.9
	38	342	371	4609.16			15	57	126	2261.9
	39	550	267	10299.6
	40	460	470	4893.62
	41	432	282	7659.57
	42	370	214	8644.86
	43	270	159	8490.57
	44	317	213	7441.31
	45	190	190	5000
	46	3	4	3750		TGF-βRIINcr1Δ		Number of Cells	Number of Beads	Absolute Number				Littermates		Number of Cells	Number of Beads	Absolute Number		TGF-βRIINcr1Δ		Number of Cells	Number of Beads	Absolute Number
	47	332	149	11140.9		ILC1s	1	2	233	42.9185				ILC1s	M11	173	58	14913.8		ILC1s	M11	121	123	4918.7
	48	160	115	6956.52			2	2	382	26.178					M21	133	47	14148.9			M21	64	43	7441.86
	49	316	183	8633.88			3	22	866	127.021					M31	120	34	17647.1			M31	32	23	6956.52
	50	424	250	8480			4	6	145	206.897					M41	162	48	16875			M41	156	99	7878.79
	51	441	298	7399.33			5	6	849	35.3357					M51	139	44	15795.5			M51	97	57	8508.77
	52	424	235	9021.28			6	17	292	291.096					M61	100	32	15625
	53	391	319	6128.53			7	15	184	407.609
	54	310	162	9567.9			8	15	271	276.753
							9	13	113	575.221
							10	12	112	535.714
Littermates		Number of Cells	Number of Beads	Absolute Number			11	20	350	285.714
trNKs	1	5226	170	153706			12	9	139	323.741
	2	1994	197	50609.1			13	5	195	128.205
	3	3716	132	140758			14	4	102	196.078
	4	5137	103	249369			15	4	126	158.73
	5	4426	155	142774
	6	3975	134	148321
	7	4492	189	118836		Table Analyzed	cNK Cells		Table Analyzed	trNK cells
	8	3740	144	129861
	9	3548	166	106867		Group B	TGFβRNcr1Δ		Group B	TGFβRNcr1Δ
	10	5037	203	124064		vs.	vs.		vs.	vs.
	11	4735	199	118970		Group A	Litermate		Group A	Litermate
	12	5990	191	156806
	13	3458	135	128074		Mann Whitney test			Mann Whitney test
	14	5828	164	177683		P value	<0.0001		P value	<0.0001
	15	5487	132	207841		Exact or approximate P value?	Exact		Exact or approximate P value?	Exact
	16	5238	174	150517		P value summary	****		P value summary	****
	17	4684	112	209107		Significantly different (P < 0.05)?	Yes		Significantly different (P < 0.05)?	Yes
	18	3500	124	141129		One- or two-tailed P value?	Two-tailed		One- or two-tailed P value?	Two-tailed
	19	2727	173	78815		Sum of ranks in group A,B	1612 , 803		Sum of ranks in group A,B	2295 , 120
	20	4807	167	143922		Mann-Whitney U	127		Mann-Whitney U	0
	21	4872	152	160263
	22	3197	129	123915
	23	5250	135	194444
	24	4378	165	132667
	25	2587	190	68078.9
	26	3237	126	128452
	27	3991	101	197574
	28	14898	526	141616
	29	7685	271	141790
	30	8280	462	89610.4
	31	7925	204	194240		Table Analyzed	ILC1s
	32	9109	310	146919
	33	7891	538	73336.4		Group B	TGFβRNcr1Δ
	34	6621	439	75410		vs.	vs.
	35	8970	361	124238		Group A	Litermate
	36	8103	403	100533
	37	7479	172	217413		Mann Whitney test
	38	9289	371	125189		P value	<0.0001
	39	8261	267	154700		Exact or approximate P value?	Exact
	40	7855	470	83563.8		P value summary	****
	41	7588	282	134539		Significantly different (P < 0.05)?	Yes
	42	7247	214	169322		One- or two-tailed P value?	Two-tailed
	43	8016	159	252075		Sum of ranks in group A,B	2295 , 120
	44	6866	213	161174		Mann-Whitney U	0
	45	7020	190	184737
	46	65	4	81250
	47	7555	149	253523
	48	6759	115	293870
	49	5998	183	163880
	50	7258	250	145160
	51	7119	298	119446
	52	8669	235	184447
	53	7008	319	109843
	54	7767	162	239722
Littermates		Number of Cells	Number of Beads	Absolute Number
ILC1s	1	524	170	15411.8
	2	489	197	12411.2
	3	773	132	29280.3
	4	778	103	37767
	5	369	155	11903.2
	6	872	134	32537.3
	7	655	189	17328
	8	906	144	31458.3
	9	542	166	16325.3
	10	640	203	15763.5
	11	1084	199	27236.2
	12	1103	191	28874.3
	13	1330	135	49259.3
	14	703	164	21432.9
	15	763	132	28901.5
	16	690	174	19827.6
	17	541	112	24151.8
	18	389	124	15685.5
	19	357	173	10317.9
	20	491	167	14700.6
	21	523	152	17203.9
	22	354	129	13720.9
	23	346	135	12814.8
	24	650	165	19697
	25	660	190	17368.4
	26	564	126	22381
	27	888	101	43960.4
	28	1752	526	16654
	29	2576	271	47527.7
	30	2579	462	27911.3
	31	2068	204	50686.3
	32	2189	310	35306.5
	33	1723	538	16013
	34	1009	439	11492
	35	1910	361	26454.3
	36	1414	403	17543.4
	37	1141	172	33168.6
	38	1581	371	21307.3
	39	1668	267	31236
	40	2403	470	25563.8
	41	1748	282	30992.9
	42	1170	214	27336.4
	43	846	159	26603.8
	44	1007	213	23638.5
	45	482	190	12684.2
	46	2	4	2500
	47	822	149	27583.9
	48	501	115	21782.6
	49	476	183	13005.5
	50	1266	250	25320
	51	1065	298	17869.1
	52	2114	235	44978.7
	53	1504	319	23573.7
	54	939	162	28981.5
