# Supplementary material for: TGF-β drives the conversion of conventional NK cells into uterine tissue-resident NK cells to support murine pregnancy
Source: eLife. 2026 Jul 8;15:RP109878. doi: 10.7554/eLife.109878 (PMC13345626; doi:10.7554/eLife.109878)
Supplement: Figure 3—source data 1. [file elife-109878-fig3-data1.xlsx]

## Sheet: Figure 3 A-C
Litter Size			Pup Birth Weight			Gestational Period
Littermate	TGF-βRIINcr1Δ		Littermate	TGF-βRIINcr1Δ		Littermate	TGF-βRIINcr1Δ
12	5		1.45	1.34		20.5	18.5
8	5		1.37	1.44		19.5	18.5
9	3		1.23	1.33		19.5	19.5
12	4		1.42	1.41		19.5	19.5
8	6		1.13	1.32		19.5	18.5
10	3		1.31	1.43		18.5	18.5
9	6		1.42	1.42		19.5	18.5
			1.2	1.36
Table Analyzed	Data 1		1.18	1.52
			1.39	1.53
Column B	TGF-βRIINcr1Δ		1.36	1.54
vs.	vs.		1.23	1.6
Column A	Littermate		1.38	1.52
			1.41	1.3
Mann Whitney test			1.33	1.38
P value	0.0006		1.27	1.31
Exact or approximate P value?	Exact		1.34	1.32
P value summary	***		1.35	1.38
Significantly different (P < 0.05)?	Yes		1.4	1.37
One- or two-tailed P value?	Two-tailed		1.38	1.42
Sum of ranks in column A,B	77 , 28		1.33	1.35
Mann-Whitney U	0		1.34	1.25
			1.38	1.31
			1.35	1.29
			1.29	1.27
			1.27	1.25
			1.31	1.28
			1.36	1.28
			1.25	1.31
			1.43	1.33
			1.46	1.29
			1.5
			1.21
			1.53
			1.33
			1.52
			1.34
			1.34
			1.31
			1.46
			1.51
			1.32
			1.41
			1.37
			1.38
			1.33
			1.3
			1.4
			1.35
			1.41
			1.38
			1.36
			1.37
			1.4
			1.35
			1.36
			1.37
			1.4
			1.37
			1.29
			1.28
			1.26
			1.3
			1.31
			1.3
			1.33
			1.29
			1.28
