# Supplementary material for: TGF-β drives the conversion of conventional NK cells into uterine tissue-resident NK cells to support murine pregnancy
Source: eLife. 2026 Jul 8;15:RP109878. doi: 10.7554/eLife.109878 (PMC13345626; doi:10.7554/eLife.109878)
Supplement: Figure 4—source data 1. [file elife-109878-fig4-data1.xlsx]

## Sheet: Figure 4 A, B
Implantaion Site Number gd 10.5			Resorption Rates gd 10.5
Littermate	TGF-βRIINcr1Δ		Littermate	TGF-βRIINcr1Δ
9	6		11.1	50
10	5		0	20
9	5		11.1	60
11	6		0	33.3
10	5		10	40
8	8		0	25
	7			71.4
Column B	TGF-βRIINcr1Δ		Column B	TGF-βRIINcr1Δ
vs.	vs.		vs.	vs.
Column A	Littermate		Column A	Littermate
Mann Whitney test			Mann Whitney test
P value	0.0017		P value	0.0012
Exact or approximate P value?	Exact		Exact or approximate P value?	Exact
P value summary	**		P value summary	**
Significantly different (P < 0.05)?	Yes		Significantly different (P < 0.05)?	Yes
One- or two-tailed P value?	Two-tailed		One- or two-tailed P value?	Two-tailed
Sum of ranks in column A,B	62.50 , 28.50		Sum of ranks in column A,B	21 , 70
Mann-Whitney U	0.5		Mann-Whitney U	0
