# Supplementary material for: TGF-β drives the conversion of conventional NK cells into uterine tissue-resident NK cells to support murine pregnancy
Source: eLife. 2026 Jul 8;15:RP109878. doi: 10.7554/eLife.109878 (PMC13345626; doi:10.7554/eLife.109878)
Supplement: Figure 4—source data 2. [file elife-109878-fig4-data2.xlsx]

## Sheet: Figure 4D
Littermate Control						TGF-βRIINcr1Δ					Table Analyzed	Data 1
Lumen	Outer Wall	Thickness	Wall:Lumen Ratio			Lumen	Outer Wall	Thickness	Wall:Lumen Ratio
8909	10500	1591	0.178583			885	4089	3204	3.62034		Column B	TGF-βRIINcr1Δ
2375	3185	810	0.341053			846	6524	5678	6.71158		vs.	vs.
6041	7285	1244	0.205926			866	5581	4715	5.44457		Column A	Littermate
25400	30700	5300	0.208661			275	1136	861	3.13091
31000	41000	10000	0.322581			3185	4893	1708	0.536264		Mann Whitney test
27800	34500	6700	0.241007			1906	8267	6361	3.33736		P value	<0.0001
5587	7390	1803	0.322713			2129	6636	4507	2.11696		Exact or approximate P value?	Approximate
251	413	162	0.645418			4389	21300	16911	3.85304		P value summary	****
9296	12400	3104	0.333907			212	4301	4089	19.2877		Significantly different (P < 0.05)?	Yes
12200	18100	5900	0.483607			1006	1604	598	0.594433		One- or two-tailed P value?	Two-tailed
47100	55600	8500	0.180467			4465	7125	2660	0.595745		Sum of ranks in column A,B	46950 , 111253
3206	6290	3084	0.961946			749	2044	1295	1.72897		Mann-Whitney U	13797
8876	13000	4124	0.464624			615	3711	3096	5.03415
2072	3067	995	0.480212			2052	3290	1238	0.603314
644	1126	482	0.748447			1168	7715	6547	5.60531
2363	3519	1156	0.489209			474	3619	3145	6.63502
1571	3785	2214	1.40929			260	2834	2574	9.9
3231	5422	2191	0.678118			2913	8495	5582	1.91624
4732	7022	2290	0.483939			1334	4826	3492	2.61769
1273	2125	852	0.669285			473	1510	1037	2.19239
811	1360	549	0.676942			2913	8495	5582	1.91624
682	1569	887	1.30059			1334	4826	3492	2.61769
9051	13800	4749	0.524693			545	5381	4836	8.87339
784	1213	429	0.547194			21300	28300	7000	0.328638
3646	6596	2950	0.809106			8473	29100	20627	2.43444
467	835	368	0.788009			4965	9304	4339	0.873917
879	1696	817	0.929465			869	3883	3014	3.46835
10600	14500	3900	0.367925			1497	6917	5420	3.62057
443	859	416	0.939052			1170	7541	6371	5.4453
1565	2347	782	0.499681			1642	2761	1119	0.681486
3462	4338	876	0.253033			1937	5135	3198	1.65101
3649	5368	1719	0.471088			8959	16100	7141	0.797076
14300	19000	4700	0.328671			60.8	1140	1079.2	17.75
4943	6789	1846	0.373457			1679	8159	6480	3.85944
12200	18200	6000	0.491803			1568	5122	3554	2.26658
226	1212	986	4.36283			1093	3728	2635	2.4108
4519	6974	2455	0.543262			2053	4406	2353	1.14613
21800	28000	6200	0.284404			3349	9472	6123	1.82831
2582	3898	1316	0.509682			298	4139	3841	12.8893
531	2921	2390	4.50094			2421	4433	2012	0.831062
1939	3694	1755	0.905106			2288	4086	1798	0.785839
714	1255	541	0.757703			2813	4704	1891	0.672236
329	1007	678	2.06079			511	2717	2206	4.31703
2612	16400	13788	5.27871			2468	7700	5232	2.11994
917	1380	463	0.504907			2006	5284	3278	1.6341
54.3	204	149.7	2.75691			1710	4696	2986	1.7462
4131	5899	1768	0.427984			2742	11600	8858	3.23049
2674	3862	1188	0.444278			2089	7479	5390	2.58018
4395	7355	2960	0.673493			3204	11400	8196	2.55805
5615	9057	3442	0.613001			4037	10700	6663	1.65048
14100	20400	6300	0.446809			1132	7059	5927	5.23587
2972	5231	2259	0.760094			2417	7310	4893	2.02441
182	1791	1609	8.84066			1660	8215	6555	3.9488
1427	2362	935	0.655221			428	1628	1200	2.80374
5294	7478	2184	0.412543			1411	17500	16089	11.4026
3671	5623	1952	0.531735			1034	3462	2428	2.34816
1544	6688	5144	3.33161			2991	5759	2768	0.925443
2685	7333	4648	1.7311			2435	10100	7665	3.14784
1464	5754	4290	2.93033			3727	8420	4693	1.25919
1865	5284	3419	1.83324			3634	8782	5148	1.41662
3235	5610	2375	0.734158			991	7089	6098	6.15338
2715	4644	1929	0.710497			922	3176	2254	2.44469
2315	5100	2785	1.20302			3315	11400	8085	2.43891
2096	4617	2521	1.20277			13100	18700	5600	0.427481
1779	4732	2953	1.65992			3466	5156	1690	0.487594
9826	14300	4474	0.455323			3007	4674	1667	0.554373
3934	7473	3539	0.899593			6297	7674	1377	0.218676
1027	5389	4362	4.24732			7591	22200	14609	1.92452
2483	7696	5213	2.09948			1722	12300	10578	6.14286
3068	7715	4647	1.51467			10400	27000	16600	1.59615
7386	22000	14614	1.97861			1577	2697	1120	0.710209
3948	9388	5440	1.37791			2152	12400	10248	4.76208
4864	13800	8936	1.83717			4206	19000	14794	3.51736
7058	19400	12342	1.74865			1001	4709	3708	3.7043
1375	5988	4613	3.35491			481	5272	4791	9.9605
5357	19900	14543	2.71477			1017	8376	7359	7.23599
2683	9276	6593	2.45732			3922	14000	10078	2.56961
1356	5854	4498	3.31711			4044	12800	8756	2.16518
1810	4178	2368	1.30829			925	3345	2420	2.61622
1863	5462	3599	1.93183			1894	6511	4617	2.4377
12600	26000	13400	1.06349			4639	15900	11261	2.42746
4342	7083	2741	0.631276			12100	16600	4500	0.371901
1438	4896	3458	2.40473			10800	20400	9600	0.888889
1638	3358	1720	1.05006			2181	5350	3169	1.453
21800	34200	12400	0.568807			3394	5484	2090	0.615793
2654	6389	3735	1.40731			5690	15300	9610	1.68893
1831	7285	5454	2.9787			3071	12100	9029	2.94008
9468	18400	8932	0.943388			61.1	588	526.9	8.62357
1967	4743	2776	1.41129			115	1859	1744	15.1652
2848	5295	2447	0.859199			1992	7800	5808	2.91566
4787	9346	4559	0.952371			590	1916	1326	2.24746
5797	11300	5503	0.949284			222	1123	901	4.05856
843	2472	1629	1.93238			4810	17400	12590	2.61746
3001	5446	2445	0.814728			1648	5422	3774	2.29005
1105	3521	2416	2.18643			976	3591	2615	2.6793
1144	2922	1778	1.5542			1195	4615	3420	2.86192
1227	3554	2327	1.8965			2194	7969	5775	2.63218
1240	3215	1975	1.59274			2110	6956	4846	2.29668
3927	7483	3556	0.905526			1312	5509	4197	3.19893
6278	13000	6722	1.07072			1322	6141	4819	3.64523
1863	4277	2414	1.29576			1745	2988	1243	0.712321
3576	7314	3738	1.0453			2501	5662	3161	1.26389
3130	4744	1614	0.515655			1055	5545	4490	4.25592
3279	5600	2321	0.707838			1254	6559	5305	4.23046
3027	7221	4194	1.38553			1681	3480	1799	1.0702
2057	5706	3649	1.77394			737	2403	1666	2.26052
3458	8722	5264	1.52227			5405	11900	6495	1.20167
2200	7012	4812	2.18727			813	3739	2926	3.59902
1598	4785	3187	1.99437			1719	3908	2189	1.27341
2220	7012	4792	2.15856			3074	9105	6031	1.96194
1598	4785	3187	1.99437			8466	16900	8434	0.99622
3894	6223	2329	0.5981			410	3076	2666	6.50244
9951	19000	9049	0.909356			8941	12000	3059	0.342132
553	3298	2745	4.96383			6911	13400	6489	0.938938
4189	7321	3132	0.747672			2047	8082	6035	2.94822
3491	6874	3383	0.969063			3544	7563	4019	1.13403
6531	12800	6269	0.959884			4368	11800	7432	1.70147
8251	16500	8249	0.999758			4158	15200	11042	2.6556
2835	7724	4889	1.72451			2480	5502	3022	1.21855
6426	15200	8774	1.36539			633	5763	5130	8.10427
5947	11800	5853	0.984194			6340	9383	3043	0.479968
1836	6356	4520	2.46187			1437	4209	2772	1.92902
3391	7970	4579	1.35034			3761	6050	2289	0.608615
2230	5059	2829	1.26861			2149	4696	2547	1.1852
2339	4858	2519	1.07696			2429	4454	2025	0.833676
2796	6644	3848	1.37625			1284	2893	1609	1.25312
3855	6358	2503	0.649287			1787	3042	1255	0.702294
1575	3855	2280	1.44762			278	1021	743	2.67266
4785	9298	4513	0.943156			761	6491	5730	7.52957
2379	6984	4605	1.93569			3274	25700	22426	6.84973
2655	6865	4210	1.58569			964	5364	4400	4.56432
5545	11400	5855	1.05591			205	1190	985	4.80488
3339	7399	4060	1.21593			1060	3657	2597	2.45
2698	7135	4437	1.64455			12000	17100	5100	0.425
13100	29600	16500	1.25954			1181	2431	1250	1.05843
3407	8097	4690	1.37658			1080	3376	2296	2.12593
2929	7248	4319	1.47456			3221	5996	11700	3.63241
4680	8818	4138	0.884188			12600	19900	7300	0.579365
2302	4068	1766	0.767159			2897	10400	7503	2.58992
8221	10800	2579	0.313709			1391	7772	6381	4.58735
4791	7002	2211	0.46149			1505	5406	3901	2.59203
1126	5575	4449	3.95115			891	5506	4615	5.17957
1565	3367	1802	1.15144			2596	8854	6258	2.41063
1579	2743	1164	0.737175			3512	6268	2756	0.784738
886	2639	1753	1.97856			1274	4406	3132	2.4584
2543	5210	2667	1.04876			479	9023	8544	17.8372
3797	7831	4034	1.06242			1790	10700	8910	4.97765
4801	10500	5699	1.18704			4283	8127	3844	0.897502
4980	9679	4699	0.943574			3759	6056	2297	0.611067
1172	3597	2425	2.06911			8659	17800	9141	1.05566
956	4693	3737	3.909			501	1903	1402	2.7984
4242	14000	9758	2.30033			1081	2742	1661	1.53654
2814	10400	7586	2.69581			705	2549	1844	2.6156
1765	6420	4655	2.63739			733	2551	1818	2.48022
7586	16100	8514	1.12233			60.9	605	544.1	8.93432
1258	4313	3055	2.42846			149	1992	1843	12.3691
2019	6161	4142	2.05151			588	3022	2434	4.13946
1098	4259	3161	2.87887			4425	5965	1540	0.348023
4211	10200	5989	1.42223			177	644	467	2.63842
3414	13200	9786	2.86643			6714	8759	2045	0.304587
4049	13300	9251	2.28476			46.2	293	246.8	5.34199
1410	5389	3979	2.82199			21.4	380	358.6	16.757
5177	12800	7623	1.47247			352	2229	1877	5.33239
1477	3085	1608	1.08869			971	3498	2527	2.60247
2979	5944	2965	0.9953			1599	5316	3717	2.32458
6908	11300	4392	0.635785			127.8	1440	1312.2	10.2676
4433	10600	6167	1.39116			989	2215	1226	1.23964
2092	4675	2583	1.2347			265	1240	975	3.67925
4539	8535	3996	0.88037			5366	12100	6734	1.25494
33400	69200	35800	1.07186			1437	5200	3763	2.61865
4133	8573	4440	1.07428			1910	6548	4638	2.42827
10200	16300	6100	0.598039			2113	7254	5141	2.43303
8833	12000	3167	0.358542			3431	10800	7369	2.14777
2386	5278	2892	1.21207			240	825	585	2.4375
2219	4999	2780	1.25282			961	4802	3841	3.99688
29200	48000	18800	0.643836			453	4073	3620	7.99117
10600	21900	11300	1.06604			1280	5551	4271	3.33672
4766	9159	4393	0.921737			646	3310	2664	4.12384
416	989	573	1.3774			1249	5513	4264	3.41393
830	2283	1453	1.7506			493	5367	4874	9.88641
18000	22200	4200	0.233333			1604	6810	5206	3.24564
567	2425	1858	3.2769			659	3707	3048	4.62519
703	2191	1488	2.11664			1785	8922	7137	3.99832
1986	3197	1211	0.609768			832	9066	8234	9.89663
13800	18300	4500	0.326087			252	3949	3697	14.6706
1301	2553	1252	0.962337			209	2417	2208	10.5646
7180	10800	3620	0.504178			266	4845	4579	17.2143
4739	8963	4224	0.891327			361	3367	3006	8.32687
585	2487	1902	3.25128			275	4100	3825	13.9091
490	1435	945	1.92857			342	3872	3530	10.3216
1254	2413	1159	0.924242			484	2602	2118	4.37603
2224	5115	2891	1.29991			771	2325	1554	2.01556
4245	9362	5117	1.20542			798	2656	1858	2.32832
2588	4871	2283	0.882148			1796	7683	5887	3.27784
1067	1947	880	0.824742			2488	9344	6856	2.75563
1938	4235	2297	1.18524			5319	13500	8181	1.53807
3724	8698	4974	1.33566			2530	7321	4791	1.89368
4084	4927	843	0.206415			7414	25900	18486	2.49339
627	2113	1486	2.37002			754	3505	2751	3.64854
879	2288	1409	1.60296			917	5188	4271	4.65758
1658	3170	1512	0.911942			8117	18300	10183	1.25453
224	1492	1268	5.66071			567	5325	4758	8.39153
8275	11600	3325	0.401813			1549	7397	5848	3.77534
13800	18800	5000	0.362319			786	8365	7579	9.64249
11700	17200	5500	0.470085			1072	5841	4769	4.44869
6208	11600	5392	0.868557			5038	25800	20762	4.12108
2248	3942	1694	0.753559			3839	35600	31761	8.27325
9191	19100	9909	1.07812			2719	11700	8981	3.30305
4590	7893	3303	0.719608			206	2614	2408	11.6893
4672	6092	1420	0.303938			442	8238	7796	17.638
9117	12700	3583	0.393002			1261	4604	3343	2.65107
2091	4521	2430	1.16212			8785	26800	18015	2.05065
6981	12700	5719	0.819224			453	3788	3335	7.36203
11300	14700	3400	0.300885			1767	6050	4283	2.42388
32600	45600	13000	0.398773			6214	21200	14986	2.41165
2469	7373	4904	1.98623			703	7304	6601	9.38976
5808	10200	4392	0.756198			1703	5567	3864	2.26894
973	2788	1815	1.86536			2600	16800	14200	5.46154
605	2036	1431	2.36529			6994	15700	8706	1.24478
426	1640	1214	2.84977			5191	22200	17009	3.27663
8104	14200	6096	0.752221			1389	9962	8573	6.17207
688	1715	1027	1.49273			2220	11400	9180	4.13514
1602	3324	1722	1.07491			1526	14800	13274	8.69856
1395	2449	1054	0.755556			1902	8311	6409	3.36961
5484	7500	2016	0.367615			7757	20600	12843	1.65567
9272	15300	6028	0.650129			1903	13200	11297	5.93642
8415	11900	3485	0.414141			3018	13110	10092	3.34394
8541	12000	3459	0.404988			5231	18500	13269	2.53661
1866	5149	3283	1.75938			1666	13000	11334	6.80312
402	1700	1298	3.22886			7457	41200	33743	4.52501
1030	3710	2680	2.60194			9889	24300	14411	1.45728
1498	3268	1770	1.18158			2828	16900	14072	4.97595
2818	5447	2629	0.932931			4832	19500	14668	3.0356
1931	3545	1614	0.835836			1033	10400	9367	9.06776
1576	3021	1445	0.916878			829	4381	3552	4.28468
1456	3991	2535	1.74107			16600	29300	12700	0.76506
973	1899	926	0.951696			15900	31400	15500	0.974843
385	730	345	0.896104			10200	22100	11900	1.16667
1496	2247	751	0.502005			887	4091	3204	3.61218
561	1369	808	1.44029			1041	10000	8959	8.60615
924	1998	1074	1.16234			564	6195	5631	9.98404
1648	2733	1085	0.658374			3463	9266	5803	1.67571
1802	2967	1165	0.646504			4654	20100	15446	3.31887
1586	3411	1825	1.15069			8466	19200	10734	1.2679
1842	4316	2474	1.34311			8379	23400	15021	1.7927
3093	7049	3956	1.27902			9824	29700	19876	2.02321
2399	3914	1515	0.631513			1059	9986	8927	8.42965
1646	2960	1314	0.798299			11100	24600	13500	1.21622
2621	5357	2736	1.04388			1325	13000	11675	8.81132
1809	5142	3333	1.84245			1452	7668	6216	4.28099
1768	3790	2022	1.14367			1018	6802	5784	5.68173
863	1732	869	1.00695			768	6494	5726	7.45573
1375	3215	1840	1.33818			11000	51800	40800	3.70909
721	3643	2922	4.0527			675	4111	3436	5.09037
3098	7377	4279	1.38121			413	8449	8036	19.4576
2016	4469	2453	1.21677			2710	8594	5884	2.17122
1734	3181	1447	0.834487			1816	9861	8045	4.43007
						5921	26000	20079	3.39115
						1992	8474	6482	3.25402
						1888	7936	6048	3.20339
						561	2609	2048	3.65062
						224	2191	1967	8.78125
						733	3864	3131	4.27149
						641	4635	3994	6.23089
						655	4482	3827	5.84275
						312	2647	2335	7.48397
						538	1942	1404	2.60967
						235	944	709	3.01702
						136	1002	866	6.36765
						366	3172	2806	7.66667
						218	1699	1481	6.79358
						232	4173	3941	16.9871
						300	1539	1239	4.13
						315	1835	1520	4.8254
						1036	3219	2183	2.10714
						1122	5236	4114	3.66667
						3891	10400	6509	1.67283
						3153	15500	12347	3.91595
						28900	72500	43600	1.50865
						1922	10500	8578	4.46306
						1603	5373	3770	2.35184
						271	1667	1396	5.15129
						233	1660	1427	6.12446
						416	1896	1480	3.55769
						716	2641	1925	2.68855
						18500	72100	53600	2.8973
						625	4960	4335	6.936
						773	6225	5452	7.05304
						2884	11500	8616	2.98752
						1617	7733	6116	3.78231
						5904	18700	12796	2.16734
						1869	8227	6358	3.40182
						2991	13700	10709	3.58041
						1584	18000	16416	10.3636
						8876	24700	15824	1.78279
						7336	16000	8664	1.18103
						3085	14500	11415	3.70016
						3678	12600	8922	2.42577
						5319	14700	9381	1.76368
						2370	17000	14630	6.173
						1819	10600	8781	4.82738
						2965	12200	9235	3.11467
						2226	11100	8874	3.98652
						1314	10200	8886	6.76256
						2072	9956	7884	3.80502
