# Supplementary material for: TGF-β drives the conversion of conventional NK cells into uterine tissue-resident NK cells to support murine pregnancy
Source: eLife. 2026 Jul 8;15:RP109878. doi: 10.7554/eLife.109878 (PMC13345626; doi:10.7554/eLife.109878)
Supplement: Figure 5—source data 1. [file elife-109878-fig5-data1.xlsx]

## Sheet: Figure 5 B,C
Number of cNK cells Transferred Per Mouse		cNK Cells	Number of Cells	Number of Beads	Absolute Number			Percent Derivided from Transferred cNK cells
3000000			198	348	2844.83			0.0948276
			267	557	2396.77			0.0798923
			205	750	1366.67			0.0455556
			343	539	3181.82			0.106061
			139	366	1898.91			0.0632969
			172	357	2408.96			0.0802988
			182	810	1123.46			0.0374486
			223	787	1416.77			0.0472258
			173	811	1066.58			0.0355528
			493	927	2659.12			0.0886372
			321	533	3011.26			0.100375
			430	1356	1585.55			0.0528515
			534	675	3955.56			0.131852
			426	1228	1734.53			0.0578176
			426	598	3561.87			0.118729
			403	860	2343.02			0.0781008
			708	765	4627.45			0.154248
			555	945	2936.51			0.0978836
			509	975	2610.26			0.0870085
			519	834	3111.51			0.103717
			621	1162	2672.12			0.0890706
			489	794	3079.35			0.102645
			702	849	4134.28			0.137809
			434	1261	1720.86			0.0573619
			514	699	3676.68			0.122556
		trNK Cells	Number of Cells	Number of Beads	Absolute Number			Percent Derivided from Transferred cNK cells
			160	348	2298.85			0.0766284
			308	557	2764.81			0.0921604
			131	750	873.333			0.0291111
			127	539	1178.11			0.0392703
			96	366	1311.48			0.0437158
			70	357	980.392			0.0326797
			247	810	1524.69			0.050823
			132	787	838.628			0.0279543
			83	811	511.714			0.0170571
			47	927	253.506			0.0084502
			45	533	422.139			0.0140713
			61	1356	224.926			0.00749754
			75	675	555.556			0.0185185
			71	1228	289.088			0.00963626
			56	598	468.227			0.0156076
			46	860	267.442			0.00891473
			72	765	470.588			0.0156863
			47	945	248.677			0.00828924
			42	975	215.385			0.00717949
			45	834	269.784			0.00899281
			51	1162	219.449			0.00731497
			31	794	195.214			0.00650714
			41	849	241.461			0.00804868
			89	1261	352.895			0.0117632
			24	699	171.674			0.00572246
		ILC1s	Number of Cells	Number of Beads	Absolute Number			Percent Derivided from Transferred cNK cells
			29	348	416.667			0.0138889
			62	557	556.553			0.0185518
			24	750	160			0.00533333
			10	539	92.7644			0.00309215
			27	366	368.852			0.0122951
			23	357	322.129			0.0107376
			14	810	86.4198			0.00288066
			14	787	88.9454			0.00296485
			10	811	61.6523			0.00205508
			9	927	48.5437			0.00161812
			10	533	93.8086			0.00312695
			25	1356	92.1829			0.00307276
			22	675	162.963			0.0054321
			19	1228	77.3616			0.00257872
			12	598	100.334			0.00334448
			16	860	93.0233			0.00310078
			35	765	228.758			0.00762527
			5	945	26.455			0.000881834
			5	975	25.641			0.000854701
			2	834	11.9904			0.00039968
			10	1162	43.0293			0.00143431
			3	794	18.8917			0.000629723
			3	849	17.6678			0.000588928
			2	1261	7.93021			0.00026434
			2	699	14.3062			0.000476872
