# Supplementary material for: TGF-β drives the conversion of conventional NK cells into uterine tissue-resident NK cells to support murine pregnancy
Source: eLife. 2026 Jul 8;15:RP109878. doi: 10.7554/eLife.109878 (PMC13345626; doi:10.7554/eLife.109878)
Supplement: Figure 5—source data 2. [file elife-109878-fig5-data2.xlsx]

## Sheet: Figrue 5D,E
Impantaion Sites gd 10.5				Resorption Rates gd 10.5
HBSS–Littermate	HBSS–TGF-βRIINcr1Δ	R–TGF-βRIINcr1Δ		HBSS–Littermate	HBSS–TGF-βRIINcr1Δ	R–TGF-βRIINcr1Δ
9	4	9		0	33.3	0
8	6	8		0	40	11.1
8	7	8		0	20	0
9	4			11.1	42.8
	7				12
Kruskal-Wallis test				Kruskal-Wallis test
P value	0.0022			P value	0.003
Exact or approximate P value?	Exact			Exact or approximate P value?	Exact
P value summary	**			P value summary	**
Do the medians vary signif. (P < 0.05)?	Yes			Do the medians vary signif. (P < 0.05)?	Yes
Number of groups	3			Number of groups	3
Kruskal-Wallis statistic	8.603			Kruskal-Wallis statistic	8.729
Data summary				Data summary
Number of treatments (columns)	3			Number of treatments (columns)	3
Number of values (total)	12			Number of values (total)	12
